# Supplementary material for: Evaluation of Discrimination Performance in Case for Multiple Non-Discriminated Samples: Classification of Honeys by Fluorescent Fingerprinting
Source: MDPI journal article supplement (doi:10.3390/s20185351), 2020-09-18
Supplement: s1 [file s1]

## Evaluation of discrimination performance in case for multiple non-discriminated samples: classification of honeys by fluorescent fingerprinting

Elizaveta A. Rukosueva, Valeria A. Belikova, Ivan N. Krylov, Vladislav S. Orekhov, Evgenii V. Skorobogatov, Andrei V. Garmash and Mikhail K. Beklemishev

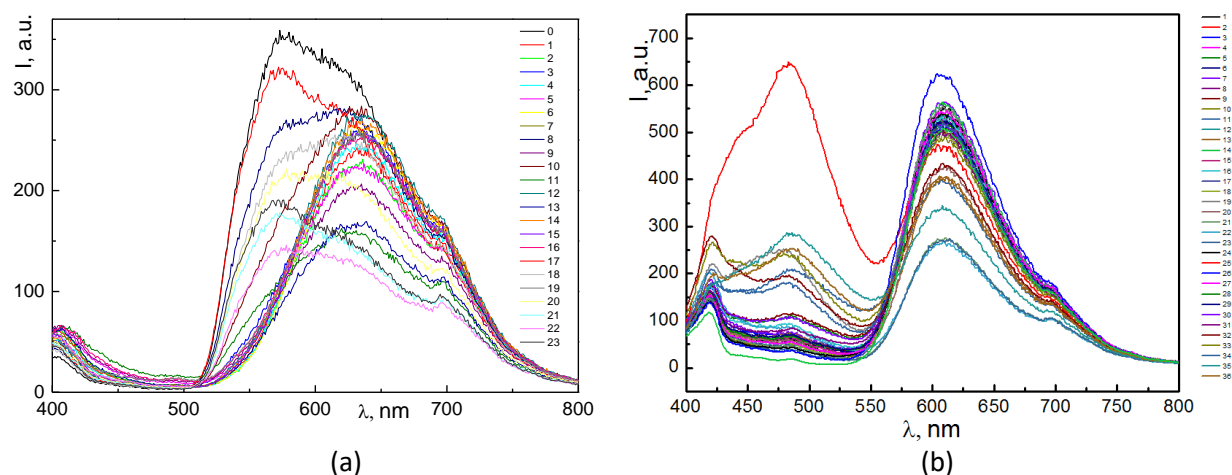

**Figure S1.** Fluorescence spectra of honey samples with added fluorophores: (a) intercalated thiazole orange (TO, ratio DNA-2 : TO = 1 : 105,  $\lambda_{\text{ex}} = 320$  nm). With large amounts of the dye (TO:DNA ratios greater than 1:53), the intrinsic fluorescence of honey is quenched, and only a TO emission peak is observed in the spectrum. The largest number of discriminated groups was achieved with the TO:DNA-2 ratio of 1:53; (b) Ru(bpy)<sub>3</sub><sup>2+</sup> (50  $\mu$ L of  $1 \times 10^{-5}$  mol/L solution added to each well). The outlying red spectrum belongs to a deeply colored sample.

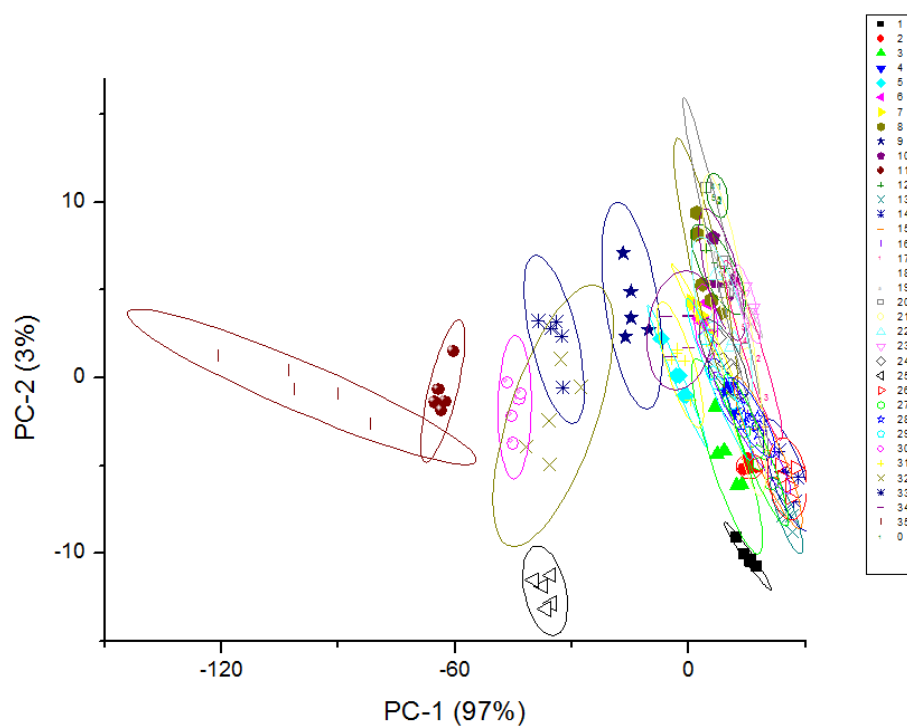

(a)

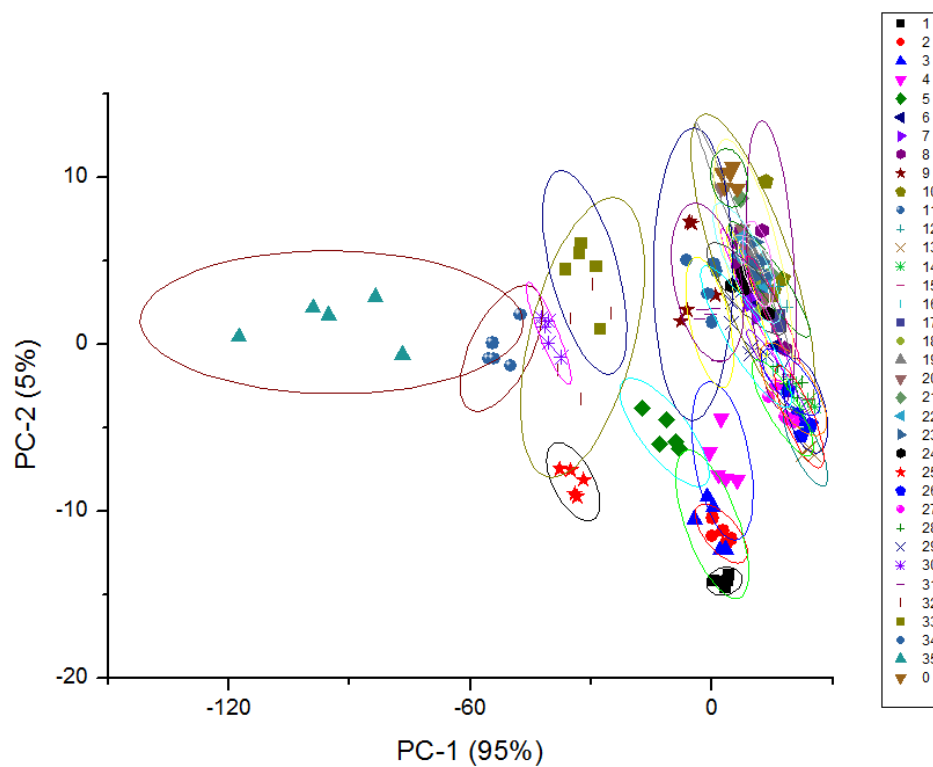

(b)

**Figure S2.** Scores plots of the visible region reflection images of honey samples in the 96-well plates: (a) without added  $\text{Ru}(\text{bpy})_3^{2+}$ , (b) in the presence of  $\text{Ru}(\text{bpy})_3^{2+}$ . Conditions are the same as used in fluorescence studies.

**Table S1.** The number of discriminated groups of points in the scores plots of 23 honey samples with added thiazole orange (TO) intercalated into DNA-2 (TO-DNA-2 fluorophore). The groups were considered separated if their confidence ellipses did not intersect .

| Composition of the Blend (Ratio<br>TO:DNA) | Number of Discriminated Groups of Points in<br>the Scores Plot |             |          |
|--------------------------------------------|----------------------------------------------------------------|-------------|----------|
|                                            | by Full Spectrum<br>(400-800 nm)                               | by One Peak |          |
|                                            |                                                                | Shortwave   | Longwave |
| Honey                                      | 7                                                              | 8           | –        |
| Honey + DNA                                | 11                                                             | 10          | –        |
| Honey + DNA + TO (1:6)                     | 10                                                             | 8           | 5        |
| Honey + DNA + TO (1:21)                    | 8                                                              | 5           | 5        |
| Honey + DNA + TO (1:53)                    | 9                                                              | –           | 12       |
| Honey + DNA + TO (1:105)                   | 4                                                              | –           | 6        |
| Honey + DNA + TO (1:210)                   | 4                                                              | –           | 5        |

### Standard formulas for the calculation of confidence ellipses (based on the instruction to Origin software)

Assuming the pair of variables (X, Y) conforms to a bivariate normal distribution, we can examine the correlation between the two variables using a confidence ellipse. The confidence ellipse is centered at  $(\bar{x}, \bar{y})$  (for a given dataset  $(x_i, y_i)$ ,  $i = 1, 2, \dots, n$ , where  $x$  is the independent variable and  $y$  is the dependent variable), and the major semiaxis  $a$  and semiaxis  $b$  equal:

$$\bar{x} = \frac{1}{n} \sum_{i=1}^n x_i, \quad \bar{y} = \frac{1}{n} \sum_{i=1}^n y_i,$$

$$a = c \sqrt{\frac{\sigma_x^2 + \sigma_y^2 + \sqrt{(\sigma_x^2 - \sigma_y^2) + 4r^2 \sigma_x^2 \sigma_y^2}}{2}}, \quad b = c \sqrt{\frac{\sigma_x^2 + \sigma_y^2 - \sqrt{(\sigma_x^2 - \sigma_y^2) + 4r^2 \sigma_x^2 \sigma_y^2}}{2}},$$

where  $\sigma_i^2$  is the variance equal.

For a given confidence level of  $(1-\alpha)$  the confidence ellipse is defined as:

$$c = \sqrt{\frac{2(n+1)(n-1)}{n(n-2)} (\alpha^{\frac{2}{2-n}} - 1)}.$$

The inclination angle of the ellipse is defined as:

$$\beta = \frac{1}{2} \arctan \frac{2r \sqrt{\sigma_x^2 \sigma_y^2}}{\sigma_x^2 - \sigma_y^2}.$$

### Matlab function for relative position (RP) calculation (composed by the authors)

```
function[RP] = relative_position (sc1,sc2)
% sc1 - double [K1,2], where K1 is count of points in first class
% sc2 - double [K2,2], where K2 is count of points in second class
c1 = mean(sc1);% C1 - the center of the first group
c2 = mean(sc2);% C2 - the center of the second group
sc1 = get_border(sc1);% any border - ellipse or convex polygon
sc2 = get_border(sc2);
% find A1,A2
for i = 1:size(sc1,1)
    proj1(i) = (c1-c2)*(sc1(i,:)-c2)'/(sqrt((c1-c2)*(c1-c2)'));
end
for i = 1:size(sc2,1)
    proj2(i) = (c2-c1)*(sc2(i,:)-c1)'/(sqrt((c1-c2)*(c1-c2)'));
end
[~,a1] = min(proj1);
a1 = sc1(a1,:);
[~,a2] = min(proj2);
a2 = sc2(a2,:);
% find D1,D2
di1 = find_d(a1,c1,c2);
```

```

    di2 = find_d(a2,c1,c2);
    % find RP
    c1c2 = sqrt((c1-c2)*(c1-c2)');
    c2d2 = sqrt((c2-di2)*(c2-di2)');
    c1d1 = sqrt((c1-di1)*(c1-di1)');
    RP = (c1c2-c2d2)/c1d1;
end

function[res] = find_d(a,ci1,ci2)
    eps = 10^(-5);
    n1 = ci2(1) - ci1(1);
    n2 = ci2(2) - ci1(2);
    if abs(n2) < eps && abs(n1) < eps
        res = a;
    elseif abs(n2) < eps
        res = [a(1),ci1(2)];
    elseif abs(n1) < eps
        res = [ci1(1),a(2)];
    elseif abs(n2-1) < eps
        de1 = (a(1)*n1^2+a(2)*n1-ci1(2)*n1+ci1(1))/(n1^2+1);
        de2 = a(2)-n1*(de1-a(1))/n2;
        res = [de1,de2];
    else
        e = -1/n1-n1;
        g=n2-1/n2;
        f=ci1(2)/n2-ci1(1)/n1-n1*a(1)-n2*a(2);
        de1 = (a(1)*n1+a(2)*n2+n2*f/g)/(n1+n2*e/g);
        de2 = a(2)-n1*(de1-a(1))/n2;
        res = [de1,de2];
    end
end
end

```

```

function[nodes] = get_border (X)%convex polygon
    X = unique(X,'rows');
    if size(X,1) == 2
        nodes = X;
    else
        [~,i] = min(X(:,2));
        nodes(1,:) = X(i,:);
        X(i,:) = [];
        for i = 1:size(X,1)

```

```

        angle(i) = acot((X(i,2)-nodes(1,2))/(X(i,1)-nodes(1,1)));%acot == arc cotangent
    end
    [angle,i] = sort(angle,'descend');
    X = X(i,:);
    X(end+1,:) = nodes(1,:);
    nodes = [X(end-1,:);nodes;X(1,:)];
    i = 2;
    while i <= length(angle)+1
        if isLeft(nodes(end-2,:),nodes(end-1,:),nodes(end,:)) > 0
            nodes(end+1,:) = X(i,:);
            i = i + 1;
        else
            nodes(end-1,:) = [];
        end
    end
end
end

function[res] = isLeft(x0,x1,x2)
    res = ((x1(1)-x0(1))*(x2(2)-x0(2)) - (x2(1)-x0(1))*(x1(2)-x0(2)));
end

function[res] = dist(x)
    res = sqrt(x(1)^2+x(2)^2);
end

```
